# Supplementary material for: In situ growth of graphitic carbon nitride films on transparent conducting substrates via a solvothermal route for photoelectrochemical performance
Source: Royal Society of Chemistry journal article supplement (doi:10.1039/c5ra21228f), 2016-01-01
Supplement: c5ra21228f1.pdf [file c5ra21228f1.pdf]

## Supporting Information

### ***In-situ* Growth of Graphitic Carbon Nitride Films on Transparent Conducting Substrates via Solvothermal Route for Photoelectrochemical Performance**

Xinxiang Xie, Xiaoli Fan, Xianli Huang, Tao Wang, and Jianping He\*

*College of Materials Science and Technology, Jiangsu Key Laboratory of Materials  
and Technology for Energy Conversion, Nanjing University of Aeronautics and  
Astronautics, 210016 Nanjing, People's Republic of China. Email:  
jianph@nuaa.edu.cn; Tel.: +86 025 52112900; Fax: +86 025 52112626.*

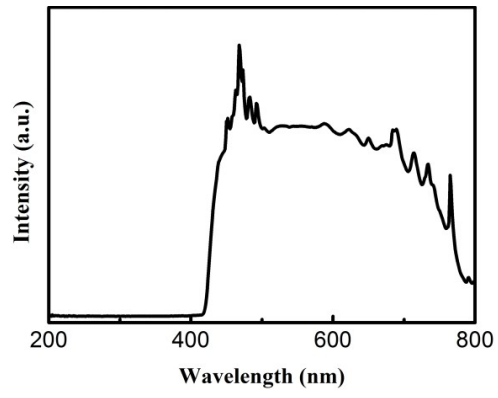

**Figure S1.** Spectrum of the Xe lamp with UV filter under 420 nm.

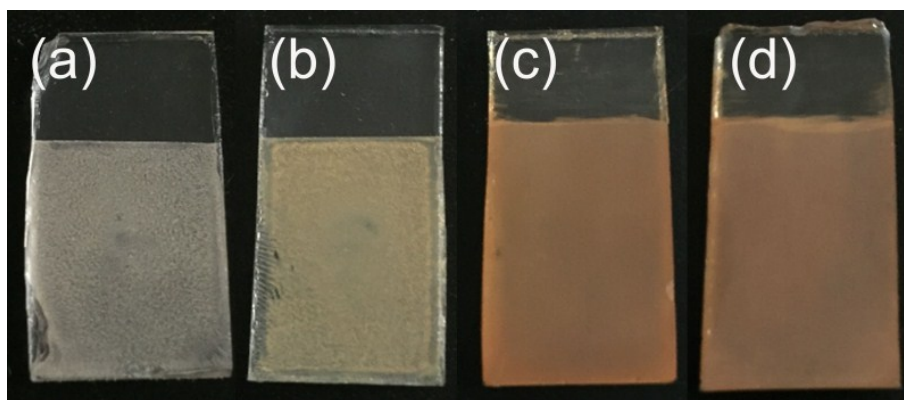

**Figure S2.** Photographs of films. (a)  $g\text{-C}_3\text{N}_4$ , (b) CN-p, (c) CN and (d) CN-h.

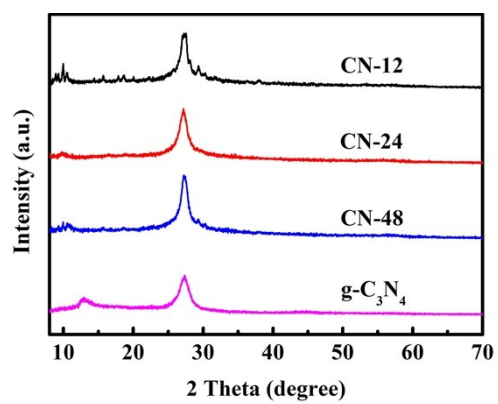

**Figure S3.** XRD patterns of carbon nitride under solvothermal reaction for 12h, 24h and 48h.

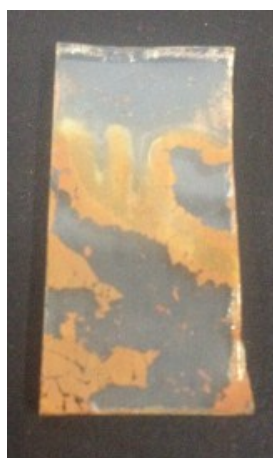

**Figure S4.** Photograph of carbon nitride film under solvothermal for 48h.

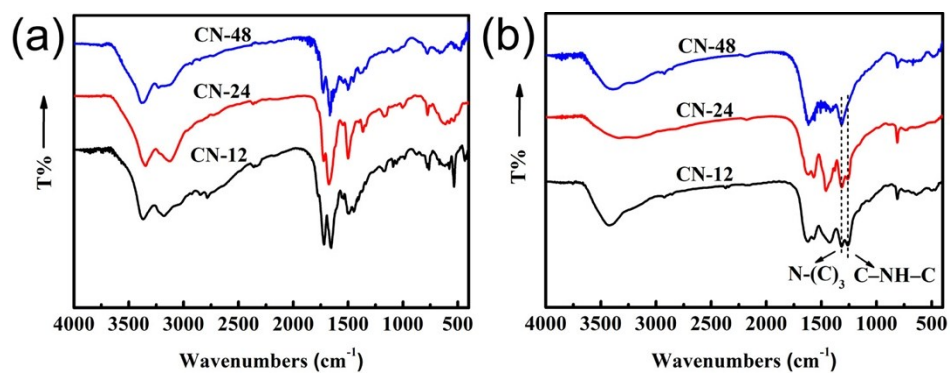

**Figure S5.** FTIR of samples under different solvothermal reaction time, (a) before annealing, (b) after annealing.

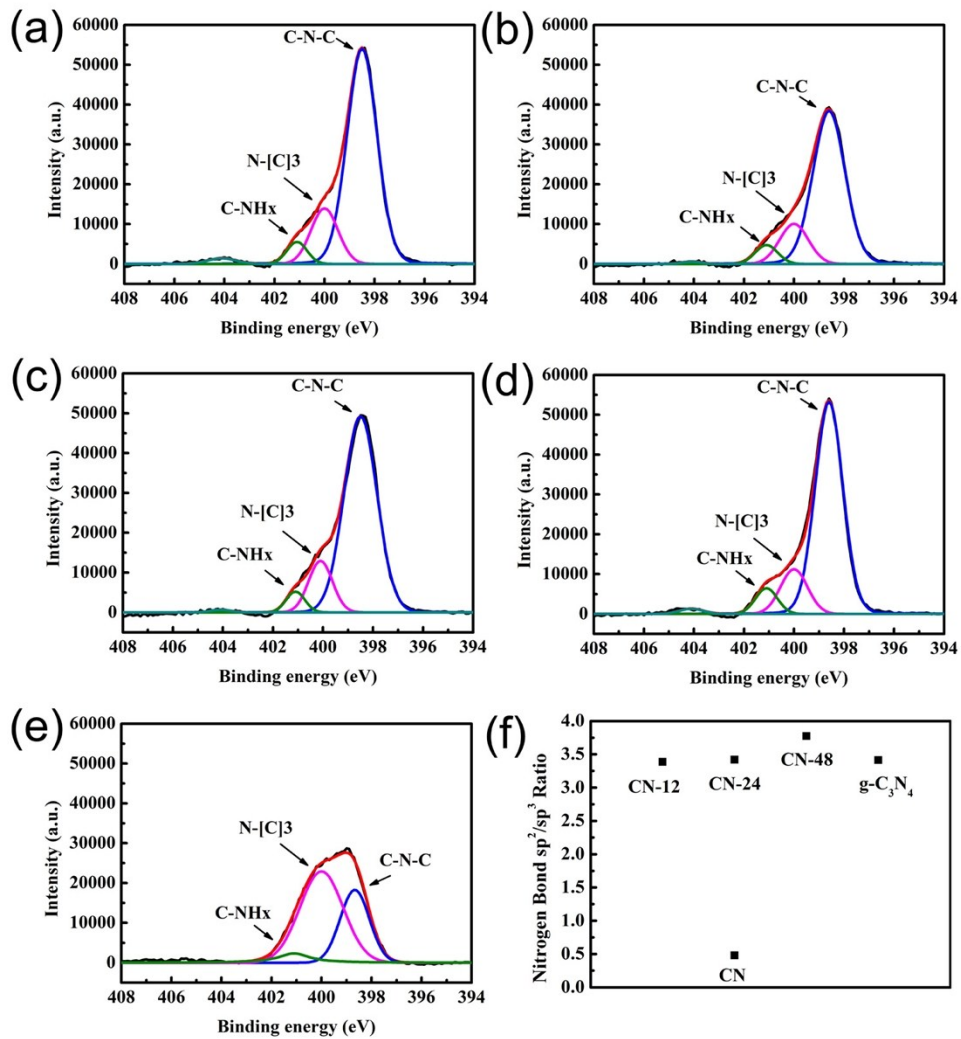

**Figure S6.** N 1s XPS spectra of (a) CN-12, (b) CN-24, (c) CN-48, (d) g-C<sub>3</sub>N<sub>4</sub>, (e) CN (Solvothermal for 24 h without annealing). (f) Nitrogen Bond ratio of  $sp^2/sp^3$ . (Nitrogen of  $sp^3$  including N-[C]3 and C-NH<sub>x</sub>).

**Table S1.** Percentage breakdown of different bonds within the N1s spectrum.

| N 1s                     |                    | Atomic % the of sample in N 1s |       |       |                                 |      |
|--------------------------|--------------------|--------------------------------|-------|-------|---------------------------------|------|
| Bond types               | Binding energy(eV) | CN-12                          | CN-24 | CN-48 | g-C <sub>3</sub> N <sub>4</sub> | CN   |
| C-N-C(sp <sup>2</sup> )  | 398.6              | 75.8                           | 76.9  | 78.5  | 76.1                            | 32.5 |
| N-[C]3(sp <sup>3</sup> ) | 400.0              | 17.3                           | 17.0  | 15.4  | 15.2                            | 60.6 |
| C-NH <sub>x</sub>        | 401.1              | 5.1                            | 5.5   | 5.4   | 7.1                             | 6.9  |
| `NO <sub>2</sub>         | 404.1              | 1.8                            | 1.6   | 0.7   | 1.5                             | -    |



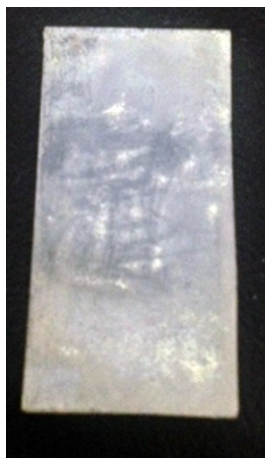

**Figure S7.** Photograph of film under solid-phase thermal condensation of the precursors.

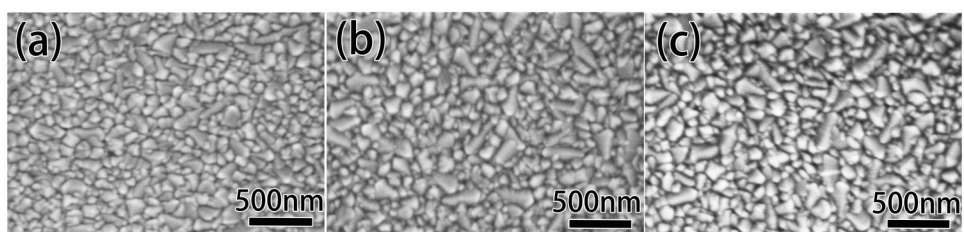

**Figure S8.** SEM images of bare FTO substrates, (a) before solvothermal, (b) after solvothermal, (c) after solvothermal and annealing processes.

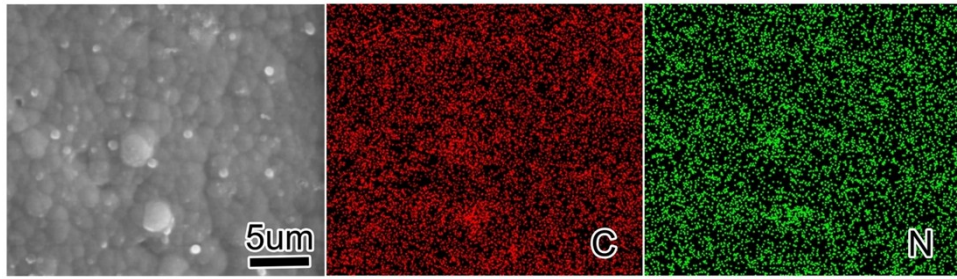

**Figure S9.** EDX mapping of CN-h sample.

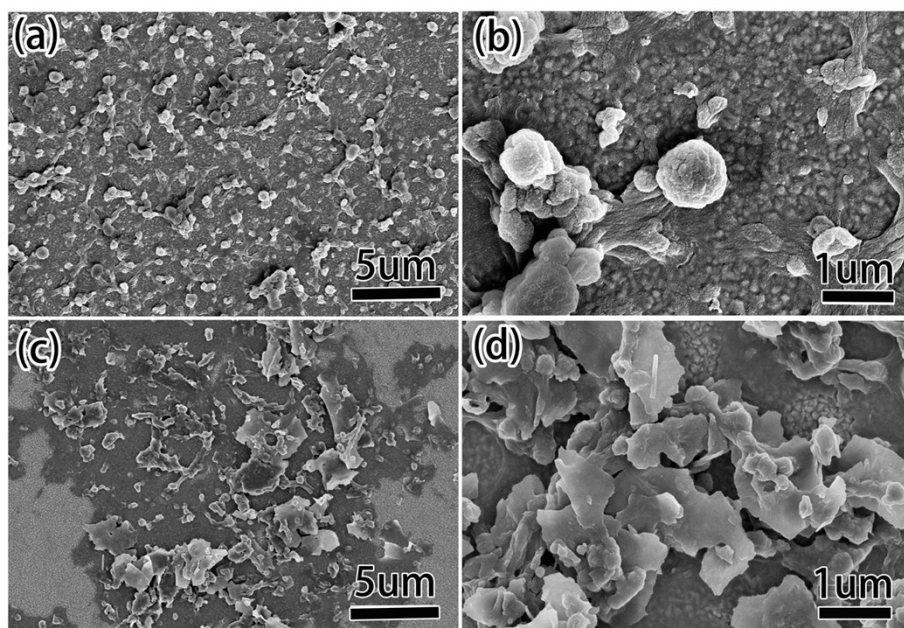

**Figure S10.** SEM images of carbon nitride films on FTO substrates after annealing at higher temperature or fast heating rate. (a) and (b) 540 °C, 1 °C /min, (c) and (d) 520 °C, 2 °C /min.
